# Supplementary material for: Towards computational design of zeolite catalysts for CO2 reduction
Source: Royal Society of Chemistry journal article supplement (doi:10.1039/c5ra06214d), 2015-01-01
Supplement: c5ra06214d1.pdf [file c5ra06214d1.pdf]

## Supporting Information

### Towards computational design of zeolite catalysts for CO<sub>2</sub> reduction

*Aaron W. Thornton, David A. Winkler, Ming Liu, Maciej Haranczyk and Danielle F. Kennedy*

#### Inverse-Ideal Adsorbed Solution Theory (I-IAST)

IAST is widely used for predicting the adsorbed concentration of multiple components given a feed (or gas phase) composition<sup>1,2</sup>. In this work, the inverse is of interest, i.e. the prediction of the feed composition required to achieve a desired adsorbed composition. Beginning with Raoult's law for vapor-liquid equilibrium,

$$Py_i = P_i^o(\pi_i)x_i \quad i = 1, \dots, N$$

where  $P$  is the total feed equilibrium pressure,  $x_i$  is the adsorbed composition of component  $i$ ,  $y_i$  is the feed composition of component  $i$ ,  $\pi_i$  is the spreading pressure of component  $i$  in the mixture and  $P_i^o$  is the hypothetical pure component pressure of component  $i$  that yields the same spreading pressure found in the mixture. According to the Gibbs adsorption isotherm, the spreading is defined as follows,

$$\frac{\pi_i}{RT} = \int_0^{P_i^o} \frac{n_i^o(P)}{P} dP \quad i = 1, \dots, N$$

where  $R$  is the universal gas constant,  $T$  is the temperature and  $n_i^o$  is the pure component capacity at pressure  $P$ . At the temperature and pressure ranges of interest, the pure component isotherms are satisfactorily modelled with the dual-site Henry and Langmuir model,

$$n_i^o(P) = k_{H,i}P + C_i \frac{k_{L,i}P}{1 + k_{L,i}P} \quad i = 1, \dots, N$$

where  $k_{H,i}$  is the Henry coefficient,  $k_{L,i}$  is the Langmuir coefficient and  $C_i$  is the saturation capacity of Langmuir sites for component  $i$ . The form of the isotherm model is not important, however there must be a good fit with the simulated data, see Figure S3 that demonstrates a good fit. These variables are fitted to the isotherm data. For a 2-component system this leaves six remaining variables. Given the target adsorbed compositions,  $x_1$  and  $x_2$ , there are four variables to be determined, namely  $y_1, y_2, P_1^o$  and  $P_2^o$ . At equilibrium the spreading pressures for each component must be identical. Therefore the four remaining variables may be solved numerically given the following four constraints,

$$\pi_1 = \pi_2$$

$$Py_1 = P_1^o x_1$$

$$Py_2 = P_2^o x_2$$

$$y_1 + y_2 = 1$$

Finally, the total loading in the adsorbed phase is calculated as,

$$n_t = \left[ \sum_{i=1}^N \frac{x_i}{n_i^o(P_i^o)} \right]^{-1}$$

Assuming complete conversion of adsorbed species,  $n_t$  is used to predict the quantity of product formation.

Table S1. Lennard-Jones parameters

| adsorbate/adsorbent                     | $\epsilon/k_B$ (K) | $\sigma$ (Å) |
|-----------------------------------------|--------------------|--------------|
| Deeg <i>et al.</i> <sup>3</sup>         |                    |              |
| H <sub>2</sub> - H <sub>2</sub>         | 36.733             | 2.958        |
| H <sub>2</sub> - Si                     | 28.256             | 1.854        |
| H <sub>2</sub> - O <sub>zeo</sub>       | 66.055             | 2.890        |
| García-Pérez <i>et al.</i> <sup>4</sup> |                    |              |
| C <sub>CO2</sub> - C <sub>CO2</sub>     | 28.129             | 2.76         |
| C <sub>CO2</sub> - O <sub>zeo</sub>     | 50.2               | 2.7815       |
| O <sub>CO2</sub> - O <sub>CO2</sub>     | 80.507             | 3.033        |
| O <sub>CO2</sub> - O <sub>zeo</sub>     | 84.93              | 2.9195       |

Table S2. Coulombic charges

| adsorbate/adsorbent                     | q (K)   |
|-----------------------------------------|---------|
| García-Pérez <i>et al.</i> <sup>4</sup> |         |
| C <sub>CO2</sub>                        | +0.6512 |
| O <sub>CO2</sub>                        | -0.3256 |
| Si                                      | +2.05   |
| O <sub>zeo</sub>                        | -1.025  |



Table S3. Top candidates with the strongest dual-adsorption properties in preparation for each product formation at 300 K and 1 bar.

| Product                                                 | Top 5 Structure Names | Product Quantity (mol/m <sup>3</sup> ) | Change in Free Energy (kJ/mol) | Required H <sub>2</sub> Feed Concentration (%) | Required CO <sub>2</sub> Feed Concentration (%) |
|---------------------------------------------------------|-----------------------|----------------------------------------|--------------------------------|------------------------------------------------|-------------------------------------------------|
| Formic Acid<br>(H <sub>2</sub> :CO <sub>2</sub> = 1:1)  | h8287217              | 41.56                                  | -13.70                         | 98.35                                          | 1.65                                            |
|                                                         | STW                   | 34.61                                  | -15.63                         | 99.41                                          | 0.59                                            |
|                                                         | FER                   | 28.16                                  | -16.39                         | 99.38                                          | 0.62                                            |
|                                                         | OFF                   | 30.06                                  | -15.15                         | 99.11                                          | 0.89                                            |
|                                                         | STI                   | 29.89                                  | -14.97                         | 99.32                                          | 0.68                                            |
| Formaldehyde<br>(H <sub>2</sub> :CO <sub>2</sub> = 2:1) | h8287217              | 21.00                                  | -15.12                         | 99.17                                          | 0.83                                            |
|                                                         | STW                   | 17.40                                  | -17.20                         | 99.70                                          | 0.30                                            |
|                                                         | h8123219              | 17.20                                  | -15.34                         | 99.82                                          | 0.18                                            |
|                                                         | FER                   | 14.16                                  | -18.15                         | 99.69                                          | 0.31                                            |
|                                                         | SOF                   | 16.67                                  | -15.30                         | 99.36                                          | 0.64                                            |
| Methanol<br>(H <sub>2</sub> :CO <sub>2</sub> = 3:1)     | STW                   | 11.62                                  | -18.77                         | 99.80                                          | 0.20                                            |
|                                                         | h8123219              | 11.50                                  | -17.32                         | 99.88                                          | 0.12                                            |
|                                                         | OSO                   | 11.08                                  | -17.45                         | 99.69                                          | 0.31                                            |
|                                                         | FER                   | 9.46                                   | -19.91                         | 99.79                                          | 0.21                                            |
|                                                         | OFF                   | 10.12                                  | -18.22                         | 99.70                                          | 0.30                                            |
| Methane<br>(H <sub>2</sub> :CO <sub>2</sub> = 4:1)      | h8315435              | 7.60                                   | -26.61                         | 99.9996                                        | 0.0004                                          |
|                                                         | h8287217              | 10.56                                  | -17.93                         | 99.58                                          | 0.42                                            |
|                                                         | PUN                   | 8.80                                   | -21.08                         | 99.69                                          | 0.31                                            |
|                                                         | STW                   | 8.72                                   | -20.34                         | 99.85                                          | 0.15                                            |
|                                                         | h8123219              | 8.64                                   | -19.30                         | 99.91                                          | 0.09                                            |

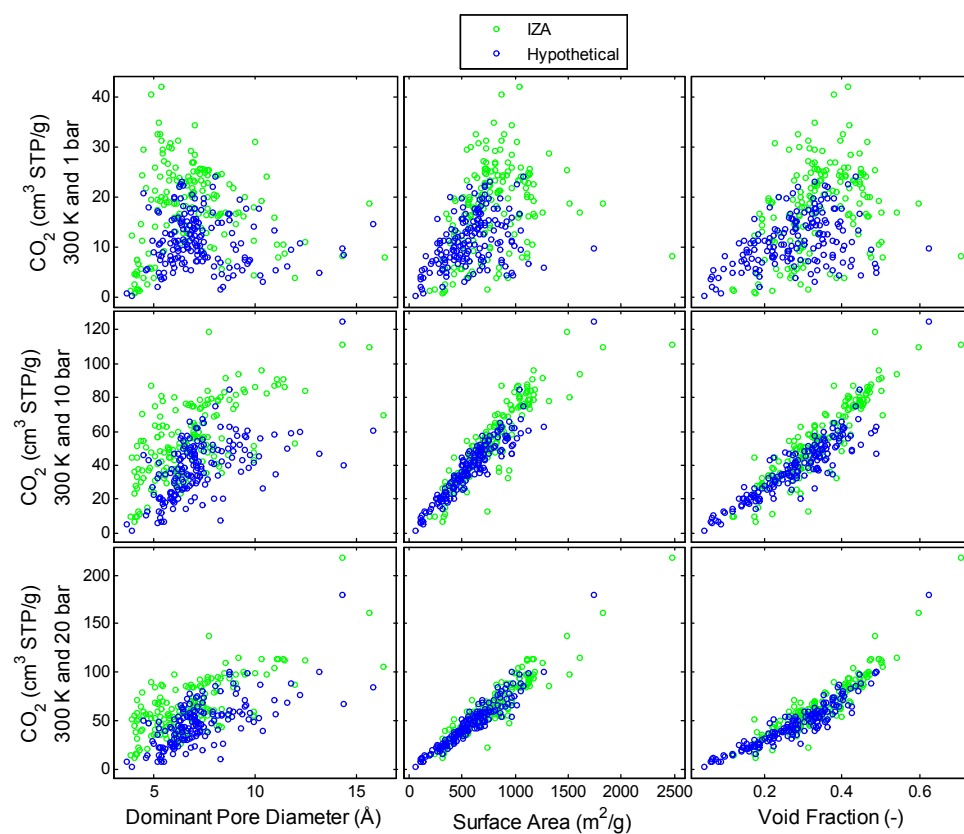

Figure S1: Gravimetric CO<sub>2</sub> uptake versus structural properties.

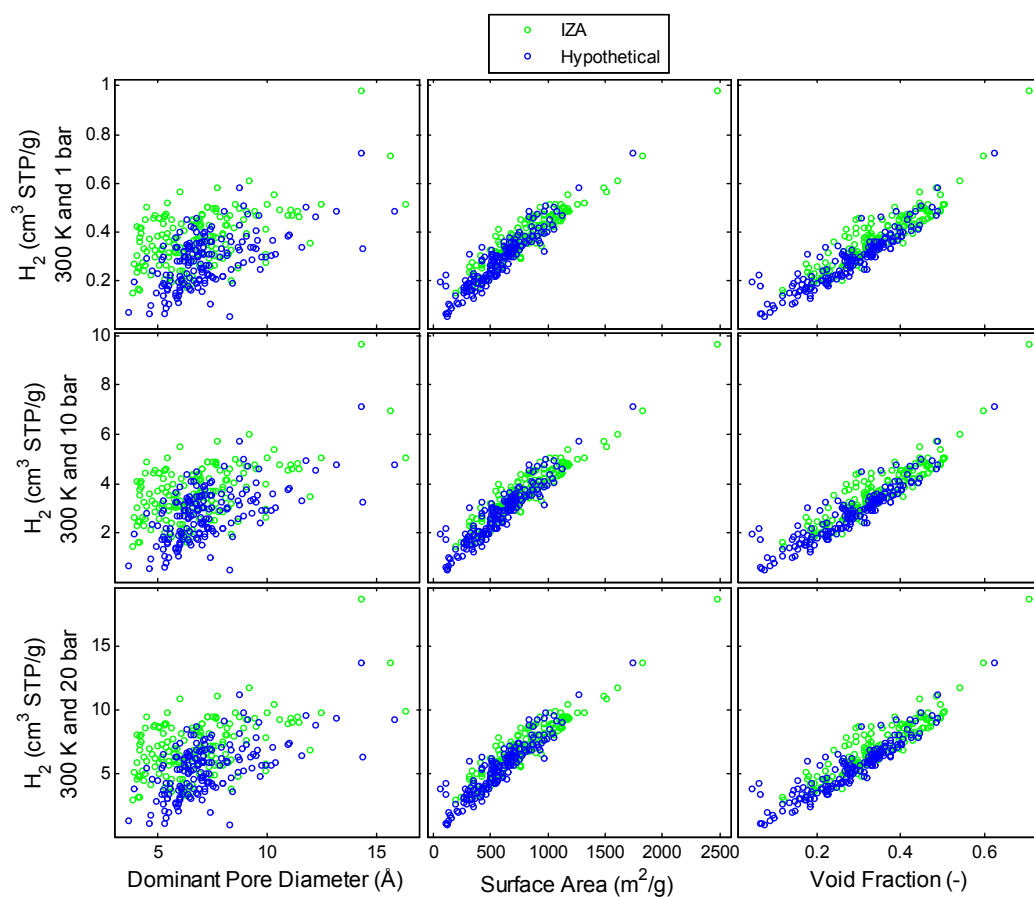

Figure S2: Gravimetric H<sub>2</sub> uptake versus structural properties.

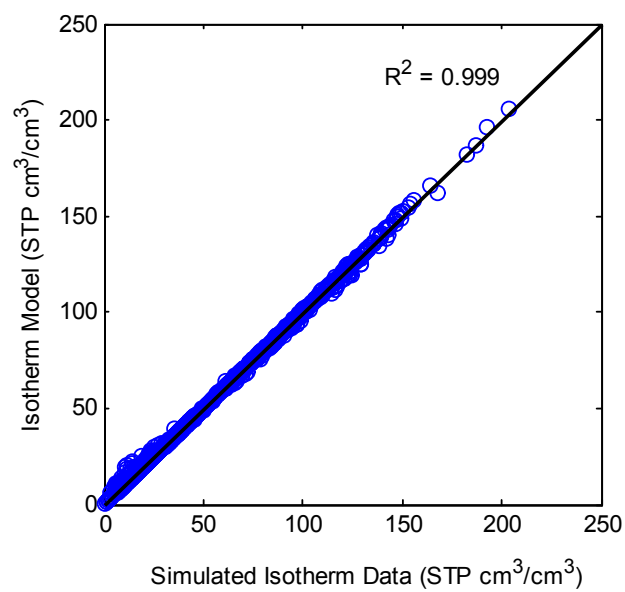

Figure S3: Fitted isotherm data using dual-site Henry and Languir model for CO<sub>2</sub> and H<sub>2</sub> up to 20 bar within both IZA and hypothetical zeolite sets.

## References

- (1) Chen, J.; Loo, L. S.; Wang, K., An Ideal Absorbed Solution Theory (IAST) Study of Adsorption Equilibria of Binary Mixtures of Methane and Ethane on a Templated Carbon. *J. Chem. Eng. Data* **2011**, *56* (4), 1209-1212.
- (2) O'Brien, J. A.; Myers, A. L., A Comprehensive Technique for Equilibrium Calculations in Adsorbed Mixtures: The Generalized Fastias Method. *Ind. Eng. Chem. Res.* **1988**, *27* (11), 2085-2092.
- (3) Deeg, K. S.; Gutiérrez-Sevillano, J. J.; Bueno-Pérez, R.; Parra, J. B.; Ania, C. O.; Doblaré, M.; Calero, S., Insights on the Molecular Mechanisms of Hydrogen Adsorption in Zeolites. *J. Phys. Chem. C* **2013**, *117* (27), 14374-14380.
- (4) García-Pérez, E.; Parra, J. B.; Ania, C. O.; García-Sánchez, A.; Baten, J. M.; Krishna, R.; Dubbeldam, D.; Calero, S., A Computational Study of CO<sub>2</sub>, N<sub>2</sub>, and CH<sub>4</sub> Adsorption in Zeolites. *Adsorption* **2007**, *13* (5-6), 469-476.
